# Supplementary material
Source: publisher figshare collection journal article supplement (https://tandf.figshare.com/ndownloader/files/40904000)
Supplement: Supplementary file 1 [file 40904000]

## Sheet: Table 1
Yang et al. (2024). Zircon inheritance. Supplemental data
Australian Journal of Earth Sciences, 71, https://doi.org/10.1080/08120099.2023.2210635
Table 1. List of detrital muscovite samples collected from Beetaloo Sub-basin drill cores.
Core drill	Coordinate	Sample	Depth (m)	Formation	Lithology
Elliott-1	E: 133.7551°	EM-3	647.6	lower Jamison Sandstone	Coarse grained sandstone
	S: 17.4025°	EM-8	895.7	Kyalla Formation	Fine grained siltstone
		EM-15	1588.6	Moroak Sandstone	Medium grained sandstone
		EM-19	1720.4	Velkerri Formation	Fine grained siltstone
Jamison-1	E: 133.7672°	JM-1	876.1	upper Jamison Sandstone	Coarse grained sandstone
	S: 16.7749°
McManus-1	E: 133.6242°	MM-4	555.1	Kyalla Formation	Fine grained siltstone
	S: 15.919°	MM-9	720.4	Moroak Sandstone	Medium grained sandstone
Altree-2	E: 133.786592°	ALT-S2	484.7	Velkerri Formation	Fine grained siltstone
	S: 15.923645°	ALT-S1	1525.7	Bessie Creek Sandstone	Coarse grained sandstone
Yang et al. (2024). Zircon inheritance. Supplemental data
Australian Journal of Earth Sciences, 71, https://doi.org/10.1080/08120099.2023.2210635
Table 2. 40Ar/39Ar dating results: ALT-S1 1H-1

## Sheet: ALT-S1 IH-1
Yang et al. (2024). Zircon inheritance. Supplemental data
Australian Journal of Earth Sciences, 71, https://doi.org/10.1080/08120099.2023.2210635
Table 2. 40Ar/39Ar dating results: ALT-S1 1H-1
Relative Abundances			36Ar [V]	%1s	37Ar [V]	%1s	38Ar [V]	%1s	39Ar [V]	%1s	40Ar [V]	%1s	40(r)/39(k)	± 2s	Age	± 2s	40Ar(r)	39Ar(k)	K/Ca	± 2s
															(Ma)		(%)	(%)
8M48242D	56.6		1.22285e-05	36.5504	-0.000993962	76.4587	9.72335e-05	5.27287	0.007481	0.332954	0.429033	0.0907342	56.8452	0.53072	1451.8	9.31816	99.1295	22.5897	-3.91411	5.98542
8M48243D	56.7	4	1.51942e-07	3595.7	-0.000825909	82.3821	4.48386e-05	9.5991	0.00318643	1.01828	0.189807	0.106381	59.5214	1.59191	1498.18	27.2422	99.9407	9.62263	-2.00657	3.30636
8M48244D	56.8	4	-1.99246e-07	3008.12	-0.000784834	84.5941	0.000189633	4.88474	0.0158778	0.247409	0.931675	0.0623266	58.6748	0.374826	1483.64	6.46617	99.9985	47.9422	-10.5204	17.7993
8M48246D	57.1	4	9.89535e-06	57.0032	-0.00114754	73.889	9.4878e-06	38.5558	0.00029953	2.36737	0.0173364	0.420708	47.5859	11.4584	1281.45	221.057	82.4357	0.906791	-0.136091	0.201217
8M48247D	57.2	4	9.00214e-07	578.406	-0.000473075	158.327	5.20975e-06	73.0299	0.000264737	2.95052	0.014695	0.408575	54.2837	12.1767	1406.25	219.247	97.9161	0.800323	-0.291358	0.92276
8M48249D	57.6	4	7.3507e-07	714.876	-0.000852196	82.4733	3.62567e-07	987.508	0.000399304	2.00262	0.0233472	0.49166	57.6649	8.2044	1466.13	142.912	98.77	1.20742	-0.244012	0.402608
8M48250D	57.7	4	7.37101e-06	53.8453	0.000688146	123.664	1.48858e-05	25.7197	0.000553154	1.31055	0.0317047	0.390442	53.4828	4.54199	1391.78	82.4379	93.2311	1.66871	0.417631	1.03298
8M48252D	58	4	5.63172e-06	102.23	-0.00103201	69.5124	5.36683e-06	69.6157	0.00029965	1.87888	0.0174797	0.343014	52.3241	11.6265	1370.62	213.507	89.9127	0.90691	-0.151346	0.210486
8M48253D	59	4	3.02484e-06	158.848	-9.99412e-05	791.251	6.43846e-05	8.55405	0.00443334	1.03607	0.261828	0.234618	58.8519	1.40845	1486.69	24.2563	99.6512	13.386	-23.0673	365.041
8M48255D	61	4	3.79345e-06	123.666	0.00039984	189.891	4.74919e-06	79.6109	0.000321325	2.28482	0.0194795	0.457776	57.2448	9.1361	1458.8	159.788	94.3471	0.969349	0.417528	1.58581
		S	4.35328e-05	37.4849	-0.00512148	46.5998	0.000436151	3.58538	0.0331163	0.226768	1.93639	0.0504892
Information on Analysis and Constants Used in Calculations									Results		40(a)/36(a)	± 2s	40(r)/39(k)	± 2s	Age	± 2s	MSWD	39Ar(k)	K/Ca	± 2s
															(Ma)			(%,n)
Sample = ALT-S1MUS				Age Equations = Min et al. (2000)					Age Plateau				58.6722	0.430683	1483.59	7.65007	1.50495	77.4103	-0.147822	0.133579
Material = mus				Negative Intensities = Allowed										0.00734051		0.00515645	0.149445	9
Location = Laser				Decay Constant 40K = 5.531 ± 0.013 E-10 1/a					Full External Error							11.938	2	2σ Confidence Limit
Analyst = Adam Frew				Decay Constant 39Ar = 2.940 ± 0.029 E-07 1/h					Analytical Error							7.42995	1.22677	Error Magnification
Project = ALAN COLLINS_BO YANG18				Decay Constant 37Ar = 8.264 ± 0.009 E-04 1/h
Mass Discrimination Law = POW				Decay Constant 36Cl = 2.303 ± 0.046 E-06 1/a					Total Fusion Age				58.0607	0.399412	1473.01	7.16423		10	-3.36276	3.13412
Irradiation = I25t80h				Decay Constant 40K(EC,β⁺) = 0.576 ± 0.002 E-10 1/a										0.00687921		0.00486366
J = 0.02167360 ± 0.00001951				Decay Constant 40K(β⁻) = 4.955 ± 0.013 E-10 1/a					Full External Error							11.5881
FCs = 28.294 ± 0.037 Ma				Atmospheric Ratio 40/36(a) = 298.56 ± 0.30					Analytical Error							6.9309
IGSN = Undefined				Atmospheric Ratio 38/36(a) = 0.1869 ± 0.0002
Preferred Age = Undefined				Production Ratio 39/37(ca) = 0.000695 ± 0.000009					Normal Isochron Overestimated Error		-34.6439	71.8566	58.6745	0.650839	1483.63	11.3746	0.23376	77.4103
Classification = Undefined				Production Ratio 38/37(ca) = 0.000020 ± 0.000001								2.07415		0.0110924		0.00766672	0.977212	9
Experiment Type = Undefined				Production Ratio 36/37(ca) = 0.000265 ± 0.000002					Full External Error							14.6075	2.06904	2σ Confidence Limit
Extraction Method = Undefined				Production Ratio 40/39(k) = 0.000730 ± 0.000091					Analytical Error							11.2277	1	Error Magnification
Heating = 60 sec				Production Ratio 38/39(k) = 0.012150 ± 0.000030												1		Number of Iterations
Isolation = 3.00 min				Production Ratio 36/38(cl) = 263.00 ± 13.15												7.81597e-14		Convergence
Instrument = MAP-215-50				Scaling Ratio K/Ca = 0.520
Lithology = Undefined				Abundance Ratio 40K/K = 1.1700 ± 0.0100 E-04					Inverse Isochron		-128.742	113.336	58.776	0.301587	1485.38	5.50823	1.02875	77.4103
Lat-Lon = Undefined - Undefined				Atomic Weight K = 39.0983 ± 0.0001 g								0.880334		0.00513112		0.00370829	0.408229	9
Feature = Undefined									Full External Error							10.7009	2.06904	2σ Confidence Limit
									Analytical Error							5.19769	1.01427	Error Magnification
																20		Number of Iterations
																1.57355e-05		Convergence
																0.0889703		Spreading Factor

## Sheet: ALT-S1 IH-2
Yang et al. (2024). Zircon inheritance. Supplemental data
Australian Journal of Earth Sciences, 71, https://doi.org/10.1080/08120099.2023.2210635
Table 2. 40Ar/39Ar dating results: ALT-S1 1H-2
Relative Abundances			36Ar [V]	%1s	37Ar [V]	%1s	38Ar [V]	%1s	39Ar [V]	%1s	40Ar [V]	%1s	40(r)/39(k)	± 2s	Age	± 2s	40Ar(r)	39Ar(k)	K/Ca	± 2s
															(Ma)		(%)	(%)
8M48844D	57		-2.24719e-06	331.753	-0.000145676	874.672	8.99632e-06	61.0885	0.000984657	1.03879	0.0586555	0.259202	60.2322	4.70633	1510.31	80.0007	101.123	2.11866	-3.51515	61.4922
8M48845D	57.1		7.95002e-06	75.9074	0.00101252	128.611	1.94265e-05	28.9665	0.00143657	0.929581	0.0902034	0.200404	61.2238	2.77216	1527.09	46.6873	97.4564	3.08918	0.737417	1.89685
8M48847D	57.2		3.2383e-06	228.518	-8.88835e-05	1451.94	7.25493e-05	12.0528	0.00546092	0.289137	0.383543	0.166986	70.0544	0.935828	1670.01	14.563	99.7452	11.749	-31.9487	927.75
8M48848D	57.3	4	-6.88938e-06	88.6413	-0.000361268	375.092	9.45821e-06	55.5963	0.000823714	1.70068	0.0587024	0.308105	73.7048	5.11425	1725.94	77.1617	103.454	1.77272	-1.18599	8.89723
8M48849D	57.6	4	3.2032e-06	199.3	-0.00192985	68.4808	9.75638e-05	9.27511	0.00729906	0.435128	0.523914	0.167581	71.6126	0.848472	1694.09	13.0289	99.7875	15.7064	-1.9671	2.69422
8M48851D	57.9	4	4.75359e-06	201.288	-0.00100967	144.911	0.000251537	4.64266	0.0209904	0.224685	1.52762	0.100661	72.7025	0.449945	1710.75	6.84583	99.9009	45.1612	-10.8108	31.3321
8M48852D	58.2	4	1.00471e-05	63.9669	-0.000760382	224.279	2.55113e-05	19.6257	0.00176243	1.0285	0.127692	0.148908	70.6941	2.63264	1679.93	40.7437	97.6029	3.79292	-1.20563	5.40801
8M48853D	62	4	-1.0172e-06	668.9	0.000767908	176.958	0.000101333	6.17278	0.00772084	0.495226	0.562179	0.128445	72.8648	0.913202	1713.22	13.8753	100.064	16.6098	5.22792	18.5026
		S	1.90385e-05	105.569	-0.00251531	156.336	0.000586375	3.6114	0.0464786	0.163177	3.33251	0.0614361
Information on Analysis and Constants Used in Calculations									Results		40(a)/36(a)	± 2s	40(r)/39(k)	± 2s	Age	± 2s	MSWD	39Ar(k)	K/Ca	± 2s
															(Ma)			(%,n)
Sample = ALT-S1MUSR				Age Equations = Min et al. (2000)					Age Plateau				72.4988	0.507033	1707.65	7.97952	1.98216	83.0431	-1.71296	2.3031
Material = mus				Negative Intensities = Allowed										0.00699368		0.00467281	0.0942273	5
Location = Laser				Decay Constant 40K = 5.531 ± 0.013 E-10 1/a					Full External Error							13.0662	2.41421	2σ Confidence Limit
Analyst = Adam Frew				Decay Constant 39Ar = 2.940 ± 0.029 E-07 1/h					Analytical Error							7.72767	1.40789	Error Magnification
Project = ALAN COLLINS_BO YANG18				Decay Constant 37Ar = 8.264 ± 0.009 E-04 1/h
Mass Discrimination Law = POW				Decay Constant 36Cl = 2.303 ± 0.046 E-06 1/a					Total Fusion Age				71.5699	0.359487	1693.44	5.86604		8	-9.60906	30.0448
Irradiation = I25t80h				Decay Constant 40K(EC,β⁺) = 0.576 ± 0.002 E-10 1/a										0.00502288		0.00346399
J = 0.02167360 ± 0.00001951				Decay Constant 40K(β⁻) = 4.955 ± 0.013 E-10 1/a					Full External Error							11.8295
FCs = 28.294 ± 0.037 Ma				Atmospheric Ratio 40/36(a) = 298.56 ± 0.30					Analytical Error							5.52216
IGSN = Undefined				Atmospheric Ratio 38/36(a) = 0.1869 ± 0.0002
Preferred Age = Undefined				Production Ratio 39/37(ca) = 0.000695 ± 0.000009					Normal Isochron		9.5056	236.338	72.7372	0.365329	1711.28	5.90288	0.395001	83.0431
Classification = Undefined				Production Ratio 38/37(ca) = 0.000020 ± 0.000001								24.863		0.0050226		0.0034494	0.756603	5
Experiment Type = Undefined				Production Ratio 36/37(ca) = 0.000265 ± 0.000002					Full External Error							11.9284	2.63299	2σ Confidence Limit
Extraction Method = Undefined				Production Ratio 40/39(k) = 0.000730 ± 0.000091					Analytical Error							5.5568	1	Error Magnification
Heating = 60 sec				Production Ratio 38/39(k) = 0.012150 ± 0.000030												1		Number of Iterations
Isolation = 3.00 min				Production Ratio 36/38(cl) = 263.00 ± 13.15												1.03678e-08		Convergence
Instrument = MAP-215-50				Scaling Ratio K/Ca = 0.520
Lithology = Undefined				Abundance Ratio 40K/K = 1.1700 ± 0.0100 E-04					Inverse Isochron Error Chron		-3711.82	29264.1	72.5479	0.499822	1708.4	7.87021	2.75415	83.0431
Lat-Lon = Undefined - Undefined				Atomic Weight K = 39.0983 ± 0.0001 g								7.88404		0.00688954		0.00460678	0.0408878	5
Feature = Undefined									Full External Error							13.0028	2.63299	2σ Confidence Limit
									Analytical Error							7.61461	1.65956	Error Magnification
																31		Number of Iterations
																1.19785e-05		Convergence
																0.0262045		Spreading Factor

## Sheet: ALT-S1 TF
			Yang et al. (2024). Zircon inheritance. Supplemental data
			Australian Journal of Earth Sciences, 71, https://doi.org/10.1080/08120099.2023.2210635
			Table 2. 40Ar/39Ar dating results: ALT-S1 TF
Relative Abundances			36Ar [V]	%1s	37Ar [V]	%1s	38Ar [V]	%1s	39Ar [V]	%1s	40Ar [V]	%1s	40(r)/39(k)	± 2s	Age	± 2s	40Ar(r)	39Ar(k)	K/Ca	± 2s
															(Ma)		(%)	(%)
8M43824	20		-0.000194068	4.94654	-0.00217842	230.996	0.00286748	1.16514	0.0135068	0.0785063	0.731833	0.377207	58.4792	0.600009	1480.26	10.3702	107.942	7.82976	-3.22451	14.897
8M43816	20		0.000215377	4.41242	0.00282389	197.016	0.000550647	6.34371	0.0450207	0.0430715	2.73902	0.0997321	59.4176	0.18366	1496.41	3.14604	97.6593	26.094	8.28991	32.6649
8M43822	20		4.94986e-05	19.3555	0.00670473	116.513	0.00137397	2.84139	0.0211462	0.0556646	1.3477	0.204086	63.0787	0.387722	1558.06	6.41893	98.9526	12.2542	1.63968	3.82089
8M43820	20		0.000176726	5.38351	0.00163258	274.338	0.000444703	8.69544	0.0238449	0.0549774	1.57682	0.173821	63.9239	0.340214	1572	5.58915	96.6619	13.8204	7.5946	41.6697
8M43818	20		0.000176445	5.43781	0.000900158	704.821	0.00032674	12.8045	0.0236902	0.0445775	1.59003	0.171975	64.898	0.34283	1587.93	5.58272	96.6903	13.7311	13.6849	192.908
8M43814	20		9.91721e-05	9.51548	0.00457817	100.815	0.000182029	26.4687	0.0207818	0.0600517	1.53736	0.177455	72.5793	0.389669	1708.88	5.93489	98.0966	12.0438	2.36008	4.75866
8M43811	20		0.000144597	6.56995	-0.00163916	367.372	0.000256387	10.9955	0.0245437	0.0458248	2.94006	0.0928192	118.019	0.34307	2294.85	3.77883	98.5266	14.2268	-7.78647	57.2107
		S	0.000667748	3.77713	0.0128219	119.604	0.00600195	1.68454	0.172534	0.020016	12.4628	0.0581533
Information on Analysis and Constants Used in Calculations									Results		40(a)/36(a)	± 2s	40(r)/39(k)	± 2s	Age	± 2s	MSWD	39Ar(k)	K/Ca	± 2s
															(Ma)			(%,n)
Sample = ALT-S1MSC				Age Equations = Min et al. (2000)					Age Plateau Cannot Calculate
Material = msc				Negative Intensities = Allowed
Location = Laser				Decay Constant 40K = 5.531 ± 0.013 E-10 1/a
Analyst = Adam Frew				Decay Constant 39Ar = 2.940 ± 0.029 E-07 1/h
Project = ALAN COLLINS_BO YANG18				Decay Constant 37Ar = 8.264 ± 0.009 E-04 1/h
Mass Discrimination Law = POW				Decay Constant 36Cl = 2.303 ± 0.046 E-06 1/a					Total Fusion Age				71.0903	0.125564	1686.05	2.7652		7	6.99685	16.737
Irradiation = I25t80h				Decay Constant 40K(EC,β⁺) = 0.576 ± 0.002 E-10 1/a										0.00176626		0.00164004
J = 0.02167360 ± 0.00001951				Decay Constant 40K(β⁻) = 4.955 ± 0.013 E-10 1/a					Full External Error							10.6011
FCs = 28.294 ± 0.037 Ma				Atmospheric Ratio 40/36(a) = 298.56 ± 0.30					Analytical Error							1.9367
IGSN = Undefined				Atmospheric Ratio 38/36(a) = 0.1869 ± 0.0002
Preferred Age = Undefined				Production Ratio 39/37(ca) = 0.000695 ± 0.000009					Normal Isochron Cannot Calculate
Classification = Undefined				Production Ratio 38/37(ca) = 0.000020 ± 0.000001
Experiment Type = Undefined				Production Ratio 36/37(ca) = 0.000265 ± 0.000002
Extraction Method = Undefined				Production Ratio 40/39(k) = 0.000730 ± 0.000091
Heating = 60 sec				Production Ratio 38/39(k) = 0.012150 ± 0.000030
Isolation = 3.00 min				Production Ratio 36/38(cl) = 263.00 ± 13.15
Instrument = ARGUS VI				Scaling Ratio K/Ca = 0.520
Lithology = Undefined				Abundance Ratio 40K/K = 1.1700 ± 0.0100 E-04					Inverse Isochron Cannot Calculate
Lat-Lon = Undefined - Undefined				Atomic Weight K = 39.0983 ± 0.0001 g
Feature = Undefined

## Sheet: ALT-S2 TF
Yang et al. (2024). Zircon inheritance. Supplemental data
Australian Journal of Earth Sciences, 71, https://doi.org/10.1080/08120099.2023.2210635
Table 2. 40Ar/39Ar dating results: ALT-S2 TF
Relative Abundances			36Ar [V]	%1s	37Ar [V]	%1s	38Ar [V]	%1s	39Ar [V]	%1s	40Ar [V]	%1s	40(r)/39(k)	± 2s	Age	± 2s	40Ar(r)	39Ar(k)	K/Ca	± 2s
															(Ma)		(%)	(%)
8M44592	13		8.12571e-05	1.13247	0.0183412	48.3195	-1.316e-05	377.013	0.00234811	0.493368	0.153992	0.0917795	56.172	0.91078	1439.94	16.0963	85.1871	2.83813	0.0662108	0.0639897
8M44586	13		2.51625e-05	4.01514	0.00954729	121.322	8.75671e-05	61.6885	0.00477872	0.318143	0.275011	0.0522572	56.2133	0.575687	1440.67	10.1701	97.543	5.79945	0.259915	0.630672
8M44580	13		3.3914e-05	2.57019	0.00270908	371.637	0.000160187	22.0569	0.0102216	0.134329	0.590213	0.0257838	56.7822	0.238982	1450.69	4.19852	98.3202	12.4199	1.96164	14.5804
8M44584	13		2.00171e-05	3.814	0.00117481	799.99	0.000126918	29.2492	0.00666796	0.163755	0.386827	0.0375164	57.1377	0.322324	1456.92	5.6432	98.4794	8.10249	2.95105	47.2162
8M44575	13		2.83593e-05	3.13468	-0.0011282	1048.97	0.000311719	14.1467	0.0224569	0.0602209	1.32084	0.0109357	58.433	0.120262	1479.46	2.07945	99.3513	27.2925	-10.351	217.157
8M44590	13		2.38128e-05	3.50738	0.010335	97.1596	2.26269e-05	229.019	0.00475717	0.234519	0.284163	0.0539917	58.4986	0.481846	1480.6	8.32637	97.7846	5.7726	0.238993	0.464412
8M44582	13		2.12155e-05	3.35795	0.00745536	127.03	0.000158254	22.8012	0.0113092	0.115288	0.669183	0.0236144	58.6897	0.206825	1483.9	3.56745	99.1407	13.7377	0.788442	2.00311
8M44578	13		3.29212e-05	2.96922	0.0063917	138.526	0.000169625	22.9182	0.0152586	0.0822098	0.908015	0.0175306	58.914	0.148276	1487.76	2.5521	98.972	18.5381	1.24101	3.43824
8M44594	13		1.77072e-05	4.40343	-0.00187812	550.883	-1.1701e-05	380.583	0.00258546	0.457827	0.161445	0.0883838	60.3101	0.928559	1511.63	15.7726	96.6322	3.14366	-0.716203	7.89088
8M44588	13		1.84762e-05	4.20935	0.0136658	75.3026	-9.85824e-06	383.146	0.00194766	0.574835	0.121429	0.11772	60.3629	1.21244	1512.53	20.5844	96.3465	2.35542	0.0737491	0.111075
		S	0.000302843	0.896665	0.0666139	48.0454	0.00100218	13.703	0.0823314	0.0481765	4.87111	0.00963682
Information on Analysis and Constants Used in Calculations									Results		40(a)/36(a)	± 2s	40(r)/39(k)	± 2s	Age	± 2s	MSWD	39Ar(k)	K/Ca	± 2s
															(Ma)			(%,n)
Sample = ALT-S2MSCRR				Age Equations = Min et al. (2000)					Age Plateau				56.6694	0.325124	1448.71	5.99297	2.29721	21.0575	0.0682207	0.0636623
Material = msc				Negative Intensities = Allowed										0.00573721		0.00413678	0.100539	3
Location = Laser				Decay Constant 40K = 5.531 ± 0.013 E-10 1/a					Full External Error							10.7942	3	2σ Confidence Limit
Analyst = Adam Frew				Decay Constant 39Ar = 2.940 ± 0.029 E-07 1/h					Analytical Error							5.71815	1.51566	Error Magnification
Project = ALAN COLLINS_BO YANG18				Decay Constant 37Ar = 8.264 ± 0.009 E-04 1/h
Mass Discrimination Law = POW				Decay Constant 36Cl = 2.303 ± 0.046 E-06 1/a					Total Fusion Age				58.1628	0.0918723	1474.78	2.41467		10	0.642331	0.617222
Irradiation = I25t80h				Decay Constant 40K(EC,β⁺) = 0.576 ± 0.002 E-10 1/a										0.00157957		0.0016373
J = 0.02167360 ± 0.00001951				Decay Constant 40K(β⁻) = 4.955 ± 0.013 E-10 1/a					Full External Error							9.43195
FCs = 28.294 ± 0.037 Ma				Atmospheric Ratio 40/36(a) = 298.56 ± 0.30					Analytical Error							1.59268
IGSN = Undefined				Atmospheric Ratio 38/36(a) = 0.1869 ± 0.0002
Preferred Age = Undefined				Production Ratio 39/37(ca) = 0.000695 ± 0.000009					Normal Isochron Error Chron		276.863	63.154	56.7698	0.534013	1450.47	9.55309	4.09677	21.0575
Classification = Undefined				Production Ratio 38/37(ca) = 0.000020 ± 0.000001								0.228105		0.00940664		0.00658619	0.0429652	3
Experiment Type = Undefined				Production Ratio 36/37(ca) = 0.000265 ± 0.000002					Full External Error							13.1161	3.82843	2σ Confidence Limit
Extraction Method = Undefined				Production Ratio 40/39(k) = 0.000730 ± 0.000091					Analytical Error							9.38285	2.02405	Error Magnification
Heating = 60 sec				Production Ratio 38/39(k) = 0.012150 ± 0.000030												1		Number of Iterations
Isolation = 3.00 min				Production Ratio 36/38(cl) = 263.00 ± 13.15												3.75462e-05		Convergence
Instrument = ARGUS VI				Scaling Ratio K/Ca = 0.520
Lithology = Undefined				Abundance Ratio 40K/K = 1.1700 ± 0.0100 E-04					Inverse Isochron		279.621	55.4001	56.7666	0.465901	1450.42	8.38092	3.1764	21.0575
Lat-Lon = Undefined - Undefined				Atomic Weight K = 39.0983 ± 0.0001 g								0.198125		0.00820732		0.00577829	0.074709	3
Feature = Undefined									Full External Error							12.2884	3.82843	2σ Confidence Limit
									Analytical Error							8.18635	1.78225	Error Magnification
																2		Number of Iterations
																1.64836e-05		Convergence
																0.1241		Spreading Factor

## Sheet: ALT-S2 IH-1
Yang et al. (2024). Zircon inheritance. Supplemental data
Australian Journal of Earth Sciences, 71, https://doi.org/10.1080/08120099.2023.2210635
Table 2. 40Ar/39Ar dating results: ALT-S2 1H-1
Relative Abundances			36Ar [V]	%1s	37Ar [V]	%1s	38Ar [V]	%1s	39Ar [V]	%1s	40Ar [V]	%1s	40(r)/39(k)	± 2s	Age	± 2s	40Ar(r)	39Ar(k)	K/Ca	± 2s
															(Ma)		(%)	(%)
8M48267D	56.8		1.46692e-07	4324.48	0.000227914	267.408	2.9165e-06	100.917	0.000298463	2.33332	0.0139102	0.439943	46.5438	12.8941	1261.23	251.552	99.8132	1.82362	0.680599	3.64009
8M48268D	56.9	4	2.94227e-06	194.377	0.000464416	113.768	-1.39365e-06	250.707	0.000551617	2.24152	0.0325615	0.251568	57.5363	6.71935	1463.89	117.189	97.4138	3.37021	0.617276	1.4048
8M48270D	57.1	4	-5.7855e-06	108.625	1.90558e-05	3495.3	2.94476e-06	121.031	0.000454818	2.44336	0.0270947	0.229252	63.3748	8.82134	1562.95	145.647	106.379	2.78035	12.4108	867.592
8M48271D	57.3	4	-1.66168e-06	360.392	-5.30516e-06	13034.7	1.2977e-05	25.0549	0.00165769	0.787207	0.100429	0.195067	60.882	2.37351	1521.32	40.1012	100.492	10.1339	-162.484	42358.4
8M48272D	57.6	4	2.29825e-06	309.155	0.000340658	176.616	0.000151234	4.19036	0.012743	0.386917	0.755865	0.0601393	59.2648	0.571266	1493.79	9.7998	99.9116	77.9	19.4513	68.7083
8M48273D	57.9	4	2.43137e-06	274.905	-0.000545934	118.497	4.66795e-06	61.7462	0.000652608	1.19681	0.0369895	0.187651	55.468	6.2605	1427.45	111.409	97.9195	3.99189	-0.621968	1.47411
		S	3.71391e-07	4201.35	0.000500804	306.292	0.000173347	5.55164	0.0163582	0.334112	0.966851	0.0531572
Information on Analysis and Constants Used in Calculations									Results		40(a)/36(a)	± 2s	40(r)/39(k)	± 2s	Age	± 2s	MSWD	39Ar(k)	K/Ca	± 2s
															(Ma)			(%,n)
Sample = ALT-S2MUS				Age Equations = Min et al. (2000)					Age Plateau				59.3268	0.577836	1494.85	10.0744	1.10261	98.1764	0.0317412	1.01685
Material = mus				Negative Intensities = Allowed										0.00973988		0.00673943	0.3533	5
Location = Laser				Decay Constant 40K = 5.531 ± 0.013 E-10 1/a					Full External Error							13.6599	2.41421	2σ Confidence Limit
Analyst = Adam Frew				Decay Constant 39Ar = 2.940 ± 0.029 E-07 1/h					Analytical Error							9.90668	1.05005	Error Magnification
Project = ALAN COLLINS_BO YANG18				Decay Constant 37Ar = 8.264 ± 0.009 E-04 1/h
Mass Discrimination Law = POW				Decay Constant 36Cl = 2.303 ± 0.046 E-06 1/a					Total Fusion Age				59.1011	0.69615	1490.98	12.0995		6	16.9848	104.046
Irradiation = I25t80h				Decay Constant 40K(EC,β⁺) = 0.576 ± 0.002 E-10 1/a										0.011779		0.00811518
J = 0.02167360 ± 0.00001951				Decay Constant 40K(β⁻) = 4.955 ± 0.013 E-10 1/a					Full External Error							15.2026
FCs = 28.294 ± 0.037 Ma				Atmospheric Ratio 40/36(a) = 298.56 ± 0.30					Analytical Error							11.9607
IGSN = Undefined				Atmospheric Ratio 38/36(a) = 0.1869 ± 0.0002
Preferred Age = Undefined				Production Ratio 39/37(ca) = 0.000695 ± 0.000009					Normal Isochron Overestimated Error		-23.6027	215.961	59.4247	0.779643	1496.53	13.4793	0.102438	98.1764
Classification = Undefined				Production Ratio 38/37(ca) = 0.000020 ± 0.000001								9.14986		0.0131198		0.00900701	0.958647	5
Experiment Type = Undefined				Production Ratio 36/37(ca) = 0.000265 ± 0.000002					Full External Error							16.3388	2.63299	2σ Confidence Limit
Extraction Method = Undefined				Production Ratio 40/39(k) = 0.000730 ± 0.000091					Analytical Error							13.3542	1	Error Magnification
Heating = 60 sec				Production Ratio 38/39(k) = 0.012150 ± 0.000030												1		Number of Iterations
Isolation = 3.00 min				Production Ratio 36/38(cl) = 263.00 ± 13.15												2.96722e-07		Convergence
Instrument = MAP-215-50				Scaling Ratio K/Ca = 0.520
Lithology = Undefined				Abundance Ratio 40K/K = 1.1700 ± 0.0100 E-04					Inverse Isochron		-746.885	2590.14	59.4512	0.956027	1496.98	16.4735	0.340264	98.1764
Lat-Lon = Undefined - Undefined				Atomic Weight K = 39.0983 ± 0.0001 g								3.46792		0.0160809		0.0110045	0.796221	5
Feature = Undefined									Full External Error							18.8861	2.63299	2σ Confidence Limit
									Analytical Error							16.3713	1	Error Magnification
																6		Number of Iterations
																0.000120146		Convergence
																0.0702814		Spreading Factor

## Sheet: ALT-S2 IH-2
Yang et al. (2024). Zircon inheritance. Supplemental data
Australian Journal of Earth Sciences, 71, https://doi.org/10.1080/08120099.2023.2210635
Table 2. 40Ar/39Ar dating results: ALT-S2 1H-2
Relative Abundances			36Ar [V]	%1s	37Ar [V]	%1s	38Ar [V]	%1s	39Ar [V]	%1s	40Ar [V]	%1s	40(r)/39(k)	± 2s	Age	± 2s	40Ar(r)	39Ar(k)	K/Ca	± 2s
															(Ma)		(%)	(%)
8M48866D	56.9		-7.0972e-06	56.8439	-0.00133687	102.881	1.1609e-05	37.1823	0.000760191	2.08886	0.0522666	0.229303	71.3154	4.36869	1689.52	67.2538	103.851	3.02018	-0.296051	0.609287
8M48867D	57	4	3.29601e-06	144.341	-0.0021024	65.6967	2.31899e-05	22.7517	0.00248695	0.600871	0.188189	0.111651	75.1633	1.46895	1747.81	21.8964	99.3877	9.87418	-0.615475	0.808728
8M48868D	57.1	4	-2.55562e-06	149.243	-0.00121411	117.909	0.000109939	6.55297	0.00823736	0.604198	0.629065	0.0939045	76.4399	0.975258	1766.74	14.386	100.105	32.6897	-3.52841	8.32072
8M48870D	57.2	4	9.08681e-07	555.307	0.000487713	179.335	0.000122923	6.99554	0.00986231	0.338788	0.750074	0.100866	76.033	0.618546	1760.73	9.15453	99.9681	39.133	10.5148	37.7136
8M48871D	57.3	4	5.85087e-07	1205.86	0.000993968	83.4123	1.32593e-05	25.8023	0.000313264	2.4206	0.0229892	0.515083	73.2433	13.9681	1718.96	211.56	99.5854	1.24031	0.163524	0.272915
8M48872D	57.6	4	-6.56191e-06	84.7363	-0.000288437	365.79	6.0972e-06	55.4278	0.000599659	1.60578	0.0450537	0.202322	78.3342	6.09645	1794.47	88.5598	104.297	2.38028	-1.08144	7.91169
8M48874D	57.9	4	1.04252e-07	7843.94	0.00116594	82.9421	1.75106e-05	36.2176	0.0012151	1.46285	0.0912696	0.388496	75.213	4.62418	1748.55	68.9006	100.066	4.81837	0.541562	0.898505
8M48875D	62	4	5.06621e-06	165.437	-5.78343e-05	2133.39	3.13605e-05	20.8245	0.00172472	1.10556	0.131917	0.25286	75.6044	3.37376	1754.37	50.1077	98.8497	6.84396	-15.5077	661.678
		S	-6.25449e-06	275.417	-0.00235203	140.187	0.000335888	4.96673	0.0251995	0.277744	1.91083	0.0582567
Information on Analysis and Constants Used in Calculations									Results		40(a)/36(a)	± 2s	40(r)/39(k)	± 2s	Age	± 2s	MSWD	39Ar(k)	K/Ca	± 2s
															(Ma)			(%,n)
Sample = ALT-S2MUSR				Age Equations = Min et al. (2000)					Age Plateau				76.0321	0.482514	1760.71	7.42299	0.503023	96.9798	0.11491	0.248263
Material = mus				Negative Intensities = Allowed										0.00634618		0.00421589	0.806567	7
Location = Laser				Decay Constant 40K = 5.531 ± 0.013 E-10 1/a					Full External Error							12.9587	2.1547	2σ Confidence Limit
Analyst = Adam Frew				Decay Constant 39Ar = 2.940 ± 0.029 E-07 1/h					Analytical Error							7.14129	1	Error Magnification
Project = ALAN COLLINS_BO YANG18				Decay Constant 37Ar = 8.264 ± 0.009 E-04 1/h
Mass Discrimination Law = POW				Decay Constant 36Cl = 2.303 ± 0.046 E-06 1/a					Total Fusion Age				75.889	0.593884	1758.59	9.02967		8	-5.57163	15.6215
Irradiation = I25t80h				Decay Constant 40K(EC,β⁺) = 0.576 ± 0.002 E-10 1/a										0.00782569		0.00513459
J = 0.02167360 ± 0.00001951				Decay Constant 40K(β⁻) = 4.955 ± 0.013 E-10 1/a					Full External Error							13.933
FCs = 28.294 ± 0.037 Ma				Atmospheric Ratio 40/36(a) = 298.56 ± 0.30					Analytical Error							8.79989
IGSN = Undefined				Atmospheric Ratio 38/36(a) = 0.1869 ± 0.0002
Preferred Age = Undefined				Production Ratio 39/37(ca) = 0.000695 ± 0.000009					Normal Isochron Overestimated Error		55.4839	237.135	75.9077	0.797413	1758.87	11.9861	0.163083	96.9798
Classification = Undefined				Production Ratio 38/37(ca) = 0.000020 ± 0.000001								4.27395		0.010505		0.00681463	0.97604	7
Experiment Type = Undefined				Production Ratio 36/37(ca) = 0.000265 ± 0.000002					Full External Error							16.0091	2.26491	2σ Confidence Limit
Extraction Method = Undefined				Production Ratio 40/39(k) = 0.000730 ± 0.000091					Analytical Error							11.8139	1	Error Magnification
Heating = 60 sec				Production Ratio 38/39(k) = 0.012150 ± 0.000030												1		Number of Iterations
Isolation = 3.00 min				Production Ratio 36/38(cl) = 263.00 ± 13.15												1.03988e-06		Convergence
Instrument = MAP-215-50				Scaling Ratio K/Ca = 0.520
Lithology = Undefined				Abundance Ratio 40K/K = 1.1700 ± 0.0100 E-04					Inverse Isochron Clustered Points		-966.719	3783.53	76.0061	0.430144	1760.33	6.68188	0.572637	96.9798
Lat-Lon = Undefined - Undefined				Atomic Weight K = 39.0983 ± 0.0001 g								3.91378		0.00565934		0.00379581	0.721069	7
Feature = Undefined									Full External Error							12.5472	2.26491	2σ Confidence Limit
									Analytical Error							6.36756	1	Error Magnification
																9		Number of Iterations
																5.00101e-06		Convergence
																0.0418947		Spreading Factor

## Sheet: EM-19 TF
Yang et al. (2024). Zircon inheritance. Supplemental data
Australian Journal of Earth Sciences, 71, https://doi.org/10.1080/08120099.2023.2210635
Table 2. 40Ar/39Ar dating results: EM-19 TF
Relative Abundances			36Ar [V]	%1s	37Ar [V]	%1s	38Ar [V]	%1s	39Ar [V]	%1s	40Ar [V]	%1s	40(r)/39(k)	± 2s	Age	± 2s	40Ar(r)	39Ar(k)	K/Ca	± 2s
															(Ma)		(%)	(%)
8M43900	20		0.000140093	6.31612	-0.000626754	963.453	0.000125437	38.5716	0.0107971	0.111648	0.490258	0.489413	41.5256	0.674163	1160.58	13.9052	91.4568	6.19671	-8.95841	172.62
8M43914	20		0.000155359	5.70921	-0.00602693	93.7311	6.0461e-05	68.9972	0.00403546	0.29628	0.278501	0.861265	57.3409	1.81834	1460.48	31.7726	83.1729	2.31836	-0.348538	0.653381
8M43895	20		9.48081e-05	9.34109	-0.00381091	149.458	0.000316623	13.7145	0.0192764	0.0608466	1.13573	0.211328	57.4263	0.380614	1461.97	6.64517	97.4807	11.0642	-2.63063	7.86335
8M43912	20		0.000148947	5.94989	-0.000411795	1943.71	0.000165098	24.7743	0.0133419	0.0909749	0.813719	0.294804	57.6523	0.555864	1465.91	9.68374	94.5298	7.65708	-16.848	654.953
8M43908	20		0.000161854	5.4873	0.00500108	144.08	0.000159963	22.174	0.0111175	0.115774	0.689747	0.34786	57.7481	0.66732	1467.58	11.6147	93.0503	6.37832	1.15561	3.33
8M43924	20		0.000150098	5.90543	-0.00582177	126.161	0.000111242	29.4989	0.0114901	0.137358	0.711252	0.33739	57.9399	0.651648	1470.92	11.321	93.6334	6.59649	-1.02665	2.59048
8M43910	20		0.000194294	4.55854	0.00123186	370.395	0.000202933	16.5223	0.0126923	0.0957813	0.798029	0.30063	58.3156	0.577262	1477.43	9.99266	92.7423	7.28364	5.3574	39.687
8M43920	20		0.000125089	7.09594	0.000280895	1841.97	8.75654e-05	55.7567	0.00630521	0.182132	0.407364	0.58896	58.689	1.1632	1483.88	20.0638	90.8365	3.61845	11.672	429.99
8M43898	20		4.91756e-05	18.0207	0.00940823	56.4649	0.000234213	15.6059	0.0172679	0.0625911	1.02793	0.233375	58.743	0.423855	1484.81	7.30721	98.6431	9.90629	0.954047	1.0774
8M43922	20		0.000146237	6.08567	-0.000376543	2080.88	0.000147399	22.6951	0.0125716	0.115167	0.789228	0.304001	59.3013	0.596176	1494.41	10.2236	94.463	7.215	-17.3615	722.547
8M43916	20		0.000153029	5.78334	-0.00348124	215.641	0.000191885	16.7333	0.00968592	0.144117	0.650009	0.369107	62.3476	0.771196	1545.91	12.8536	92.9286	5.56014	-1.44717	6.24136
8M43902	20		0.000135926	6.55518	0.00335429	175.602	0.000168301	25.2052	0.0138905	0.0866215	0.914929	0.262277	62.9748	0.532917	1556.34	8.83111	95.5924	7.97041	2.15301	7.56147
8M43906	20		0.000177849	4.98073	2.52602e-05	23001.4	0.000112832	28.4786	0.00968964	0.117772	0.751997	0.319029	72.128	0.764722	1701.99	11.6916	92.9383	5.56088	199.468	91761
8M43918	20		0.000141294	6.33237	-0.00401922	128.063	0.000213591	14.7479	0.00733618	0.169496	0.616669	0.389112	78.2363	1.0228	1793.05	14.8693	93.1089	4.21184	-0.949503	2.43193
8M43904	20		0.000156089	5.68427	0.00575183	109.788	0.000199237	19.1807	0.014749	0.0867431	1.23107	0.194911	80.36	0.511266	1823.66	7.30795	96.2506	8.46219	1.33304	2.92704
		S	0.00213014	1.61352	0.000478275	5117.79	0.00249678	5.97471	0.174247	0.0280106	11.3064	0.0821875
Information on Analysis and Constants Used in Calculations									Results		40(a)/36(a)	± 2s	40(r)/39(k)	± 2s	Age	± 2s	MSWD	39Ar(k)	K/Ca	± 2s
															(Ma)			(%,n)
Sample = E-19MSC				Age Equations = Min et al. (2000)					Age Plateau				57.7585	0.297891	1467.76	5.49093	1.66671	44.9166	-0.348025	0.620359
Material = msc				Negative Intensities = Allowed										0.00515752		0.00374102	0.12464	7
Location = Laser				Decay Constant 40K = 5.531 ± 0.013 E-10 1/a					Full External Error							10.6112	2.1547	2σ Confidence Limit
Analyst = Adam Frew				Decay Constant 39Ar = 2.940 ± 0.029 E-07 1/h					Analytical Error							5.18426	1.29101	Error Magnification
Project = ALAN COLLINS_BO YANG18				Decay Constant 37Ar = 8.264 ± 0.009 E-04 1/h
Mass Discrimination Law = POW				Decay Constant 36Cl = 2.303 ± 0.046 E-06 1/a					Total Fusion Age				61.2375	0.164519	1527.31	3.33474		15	189.447	19391.1
Irradiation = I25t80h				Decay Constant 40K(EC,β⁺) = 0.576 ± 0.002 E-10 1/a										0.00268658		0.0021834
J = 0.02167360 ± 0.00001951				Decay Constant 40K(β⁻) = 4.955 ± 0.013 E-10 1/a					Full External Error							9.9721
FCs = 28.294 ± 0.037 Ma				Atmospheric Ratio 40/36(a) = 298.56 ± 0.30					Analytical Error							2.7704
IGSN = Undefined				Atmospheric Ratio 38/36(a) = 0.1869 ± 0.0002
Preferred Age = Undefined				Production Ratio 39/37(ca) = 0.000695 ± 0.000009					Normal Isochron		341.104	44.4926	57.2508	0.5531	1458.9	9.83946	1.13838	44.9166
Classification = Undefined				Production Ratio 38/37(ca) = 0.000020 ± 0.000001								0.130437		0.009661		0.00674442	0.337363	7
Experiment Type = Undefined				Production Ratio 36/37(ca) = 0.000265 ± 0.000002					Full External Error							13.3567	2.26491	2σ Confidence Limit
Extraction Method = Undefined				Production Ratio 40/39(k) = 0.000730 ± 0.000091					Analytical Error							9.673	1.06695	Error Magnification
Heating = 60 sec				Production Ratio 38/39(k) = 0.012150 ± 0.000030												1		Number of Iterations
Isolation = 3.00 min				Production Ratio 36/38(cl) = 263.00 ± 13.15												0.000174683		Convergence
Instrument = ARGUS VI				Scaling Ratio K/Ca = 0.520
Lithology = Undefined				Abundance Ratio 40K/K = 1.1700 ± 0.0100 E-04					Inverse Isochron		341.792	44.7396	57.2855	0.553719	1459.51	9.84701	1.08112	44.9166
Lat-Lon = Undefined - Undefined				Atomic Weight K = 39.0983 ± 0.0001 g								0.130897		0.00966597		0.00674679	0.368406	7
Feature = Undefined									Full External Error							13.3644	2.26491	2σ Confidence Limit
									Analytical Error							9.68059	1.03977	Error Magnification
																4		Number of Iterations
																7.40837e-06		Convergence
																0.142152		Spreading Factor

## Sheet: EM-19 IH-1
Yang et al. (2024). Zircon inheritance. Supplemental data
Australian Journal of Earth Sciences, 71, https://doi.org/10.1080/08120099.2023.2210635
Table 2. 40Ar/39Ar dating results: EM-19 1H-1
Relative Abundances			36Ar [V]	%1s	37Ar [V]	%1s	38Ar [V]	%1s	39Ar [V]	%1s	40Ar [V]	%1s	40(r)/39(k)	± 2s	Age	± 2s	40Ar(r)	39Ar(k)	K/Ca	± 2s
															(Ma)		(%)	(%)
8M48258D	56.7	4	6.50148e-07	572.927	-0.000376114	156.978	1.88979e-05	32.0766	0.00157553	0.454742	0.0925045	0.279124	58.5606	1.54521	1481.67	26.6856	99.7568	10.7109	-2.17863	6.83996
8M48259D	56.8	4	6.99502e-07	530.63	-0.00129698	52.8339	2.40408e-05	26.6037	0.00187766	1.05762	0.11052	0.220284	58.6655	1.73256	1483.48	29.8913	99.717	12.7689	-0.753174	0.796022
8M48260D	56.9	4	7.55783e-06	47.2384	-0.000516931	162.267	3.20458e-05	17.5349	0.00247313	0.777636	0.144265	0.184157	57.3949	1.26062	1461.42	22.016	98.4063	16.8127	-2.48818	8.07506
8M48262D	57.1	4	5.32989e-06	83.3731	-0.000722446	85.1713	1.11227e-05	58.0565	0.00114784	1.40724	0.0675708	0.343722	57.4059	2.84955	1461.61	49.7602	97.5592	7.80546	-0.826549	1.40816
8M48263D	57.3	4	-1.05626e-06	371.442	-0.000853847	78.8611	7.4421e-06	92.7768	0.000605969	1.58816	0.0348577	0.653075	57.8754	4.34654	1469.79	75.5589	100.71	4.12291	-0.369402	0.582747
8M48264D	57.6	4	3.38191e-06	122.864	-0.000987901	67.3087	7.92321e-05	8.3276	0.00702858	0.488697	0.410628	0.0994564	58.2614	0.680129	1476.49	11.7794	99.7338	47.7791	-3.69998	4.98096
		S	1.6563e-05	58.1622	-0.00475422	35.1709	0.000172781	9.00595	0.0147087	0.329502	0.860345	0.0796065
Information on Analysis and Constants Used in Calculations									Results		40(a)/36(a)	± 2s	40(r)/39(k)	± 2s	Age	± 2s	MSWD	39Ar(k)	K/Ca	± 2s
															(Ma)			(%,n)
Sample = E19MUS				Age Equations = Min et al. (2000)					Age Plateau				58.1509	0.518538	1474.58	9.17163	0.493559	100	-0.573471	0.442626
Material = mus				Negative Intensities = Allowed										0.00891712		0.00621984	0.781337	6
Location = Laser				Decay Constant 40K = 5.531 ± 0.013 E-10 1/a					Full External Error							12.9317	2.26491	2σ Confidence Limit
Analyst = Adam Frew				Decay Constant 39Ar = 2.940 ± 0.029 E-07 1/h					Analytical Error							8.99029	1	Error Magnification
Project = ALAN COLLINS_BO YANG18				Decay Constant 37Ar = 8.264 ± 0.009 E-04 1/h
Mass Discrimination Law = POW				Decay Constant 36Cl = 2.303 ± 0.046 E-06 1/a					Total Fusion Age				58.1167	0.55549	1473.98	9.80347		6	-1.60915	1.13195
Irradiation = I25t80h				Decay Constant 40K(EC,β⁺) = 0.576 ± 0.002 E-10 1/a										0.00955819		0.006651
J = 0.02167360 ± 0.00001951				Decay Constant 40K(β⁻) = 4.955 ± 0.013 E-10 1/a					Full External Error							13.3851
FCs = 28.294 ± 0.037 Ma				Atmospheric Ratio 40/36(a) = 298.56 ± 0.30					Analytical Error							9.63412
IGSN = Undefined				Atmospheric Ratio 38/36(a) = 0.1869 ± 0.0002
Preferred Age = Undefined				Production Ratio 39/37(ca) = 0.000695 ± 0.000009					Normal Isochron Overestimated Error		11.4214	326.411	58.437	0.659772	1479.53	11.5517	0.0996293	100
Classification = Undefined				Production Ratio 38/37(ca) = 0.000020 ± 0.000001								28.5789		0.0112903		0.0078077	0.982598	6
Experiment Type = Undefined				Production Ratio 36/37(ca) = 0.000265 ± 0.000002					Full External Error							14.7322	2.41421	2σ Confidence Limit
Extraction Method = Undefined				Production Ratio 40/39(k) = 0.000730 ± 0.000091					Analytical Error							11.4077	1	Error Magnification
Heating = 60 sec				Production Ratio 38/39(k) = 0.012150 ± 0.000030												1		Number of Iterations
Isolation = 3.00 min				Production Ratio 36/38(cl) = 263.00 ± 13.15												1.28483e-06		Convergence
Instrument = MAP-215-50				Scaling Ratio K/Ca = 0.520
Lithology = Undefined				Abundance Ratio 40K/K = 1.1700 ± 0.0100 E-04					Inverse Isochron Clustered Points		111.351	180.192	58.3816	0.514453	1478.57	9.08355	0.457983	100
Lat-Lon = Undefined - Undefined				Atomic Weight K = 39.0983 ± 0.0001 g								1.61823		0.0088119		0.00614346	0.766635	6
Feature = Undefined									Full External Error							12.8846	2.41421	2σ Confidence Limit
									Analytical Error							8.89977	1	Error Magnification
																6		Number of Iterations
																1.61049e-05		Convergence
																0.0217148		Spreading Factor

## Sheet: EM-19 IH-2
	Yang et al. (2024). Zircon inheritance. Supplemental data
	Australian Journal of Earth Sciences, 71, https://doi.org/10.1080/08120099.2023.2210635
	Table 2. 40Ar/39Ar dating results: EM-19 1H-2
Relative Abundances			36Ar [V]	%1s	37Ar [V]	%1s	38Ar [V]	%1s	39Ar [V]	%1s	40Ar [V]	%1s	40(r)/39(k)	± 2s	Age	± 2s	40Ar(r)	39Ar(k)	K/Ca	± 2s
															(Ma)		(%)	(%)
8M48855D	57	4	5.58749e-06	111.454	-0.000141914	846.498	0.000106708	6.11837	0.00872103	0.190838	0.635528	0.090396	72.6789	0.526098	1710.39	8.00608	99.7347	35.87	-31.9559	541.012
8M48856D	57.1	4	-7.82567e-06	69.4091	0.00142689	96.9869	6.20749e-05	9.5241	0.0055899	0.404858	0.411534	0.154907	74.0716	0.866521	1731.46	13.0338	100.594	22.9872	2.03676	3.95081
8M48858D	57.2	4	-1.43372e-07	3063.69	0.000716799	207.326	4.18277e-05	17.3273	0.00291139	1.11278	0.214315	0.131688	73.6589	1.88335	1725.24	28.4261	100.046	11.9725	2.1117	8.75633
8M48859D	57.3	4	6.49564e-07	710.126	0.000805264	170.297	2.40806e-05	30.2342	0.00168533	0.91421	0.124397	0.0635148	73.7583	2.12722	1726.74	32.0803	99.8946	6.92945	1.08794	3.7055
8M48860D	57.6	4	2.21588e-06	200.01	0.00139575	102.238	1.40742e-05	42.1095	0.000958513	1.3095	0.0696921	0.162641	72.2062	3.36984	1703.18	51.4866	99.2085	3.93837	0.356741	0.729511
8M48862D	57.9	4	2.95692e-06	264.534	-0.00113545	85.3306	4.68539e-06	106.28	0.000186398	4.79097	0.014631	0.575766	72.9666	25.9391	1714.76	393.784	93.3525	0.769899	-0.0857258	0.14653
8M48863D	58.2	4	1.95533e-06	384.166	0.000780684	123.991	2.23088e-05	23.829	0.00172984	0.639862	0.125	0.239793	71.9811	2.7763	1699.74	42.4989	99.5815	7.11262	1.15186	2.85643
8M48864D	62	4	9.7516e-07	818.253	0.00117806	96.5423	3.41837e-05	17.1337	0.00253426	0.666388	0.184059	0.153632	72.5732	2.12839	1708.78	32.4184	99.8916	10.42	1.11827	2.15926
		S	6.37129e-06	276.247	0.00502609	70.7725	0.000309944	5.64016	0.0243166	0.214522	1.77916	0.056545
Information on Analysis and Constants Used in Calculations									Results		40(a)/36(a)	± 2s	40(r)/39(k)	± 2s	Age	± 2s	MSWD	39Ar(k)	K/Ca	± 2s
															(Ma)			(%,n)
Sample = E19MUSR				Age Equations = Min et al. (2000)					Age Plateau				73.055	0.478969	1716.11	7.53474	1.35072	100	-0.0552531	0.142945
Material = mus				Negative Intensities = Allowed										0.00655628		0.0043906	0.221616	8
Location = Laser				Decay Constant 40K = 5.531 ± 0.013 E-10 1/a					Full External Error							12.835	2.06904	2σ Confidence Limit
Analyst = Adam Frew				Decay Constant 39Ar = 2.940 ± 0.029 E-07 1/h					Analytical Error							7.26588	1.1622	Error Magnification
Project = ALAN COLLINS_BO YANG18				Decay Constant 37Ar = 8.264 ± 0.009 E-04 1/h
Mass Discrimination Law = POW				Decay Constant 36Cl = 2.303 ± 0.046 E-06 1/a					Total Fusion Age				73.1141	0.541189	1717	8.44482		8	2.51544	3.5605
Irradiation = I25t80h				Decay Constant 40K(EC,β⁺) = 0.576 ± 0.002 E-10 1/a										0.00740198		0.00491835
J = 0.02167360 ± 0.00001951				Decay Constant 40K(β⁻) = 4.955 ± 0.013 E-10 1/a					Full External Error							13.3932
FCs = 28.294 ± 0.037 Ma				Atmospheric Ratio 40/36(a) = 298.56 ± 0.30					Analytical Error							8.20568
IGSN = Undefined				Atmospheric Ratio 38/36(a) = 0.1869 ± 0.0002
Preferred Age = Undefined				Production Ratio 39/37(ca) = 0.000695 ± 0.000009					Normal Isochron Overestimated Error		-100.213	567.409	73.5012	0.804581	1722.86	12.3231	0.176503	100
Classification = Undefined				Production Ratio 38/37(ca) = 0.000020 ± 0.000001								5.66204		0.0109465		0.00715271	0.983276	8
Experiment Type = Undefined				Production Ratio 36/37(ca) = 0.000265 ± 0.000002					Full External Error							16.1417	2.1547	2σ Confidence Limit
Extraction Method = Undefined				Production Ratio 40/39(k) = 0.000730 ± 0.000091					Analytical Error							12.1598	1	Error Magnification
Heating = 60 sec				Production Ratio 38/39(k) = 0.012150 ± 0.000030												1		Number of Iterations
Isolation = 3.00 min				Production Ratio 36/38(cl) = 263.00 ± 13.15												2.44853e-06		Convergence
Instrument = MAP-215-50				Scaling Ratio K/Ca = 0.520
Lithology = Undefined				Abundance Ratio 40K/K = 1.1700 ± 0.0100 E-04					Inverse Isochron Overestimated Error		-499.105	722.714	73.163	0.589523	1717.74	9.15509	0.19503	100
Lat-Lon = Undefined - Undefined				Atomic Weight K = 39.0983 ± 0.0001 g								1.44802		0.00805766		0.00532971	0.978332	8
Feature = Undefined									Full External Error							13.8549	2.1547	2σ Confidence Limit
									Analytical Error							8.93487	1	Error Magnification
																5		Number of Iterations
																1.70217e-05		Convergence
																0.0773441		Spreading Factor

[truncated: 14 more sheets: EM-15 IH-1, EM-15 IH-2, EM-15 TF, MM-9 TF, MM-9 IH-1, MM-9 IH-2, EM-8 TF, EM-8 IH, MM-4 TF, MM-4 IH, EM-3 TF, EM-3 IH, JM-1 TF, JM-1 IH]
